# Supplementary material for: Differential Cytokine Responses in Hospitalized COVID-19 Patients Limit Efficacy of Remdesivir
Source: PubMed Central journal article supplement (PMC8275132; doi:10.3389/fimmu.2021.680188), 2021-06-28
Supplement: DataSheet_1.pdf [file DataSheet_1.pdf]

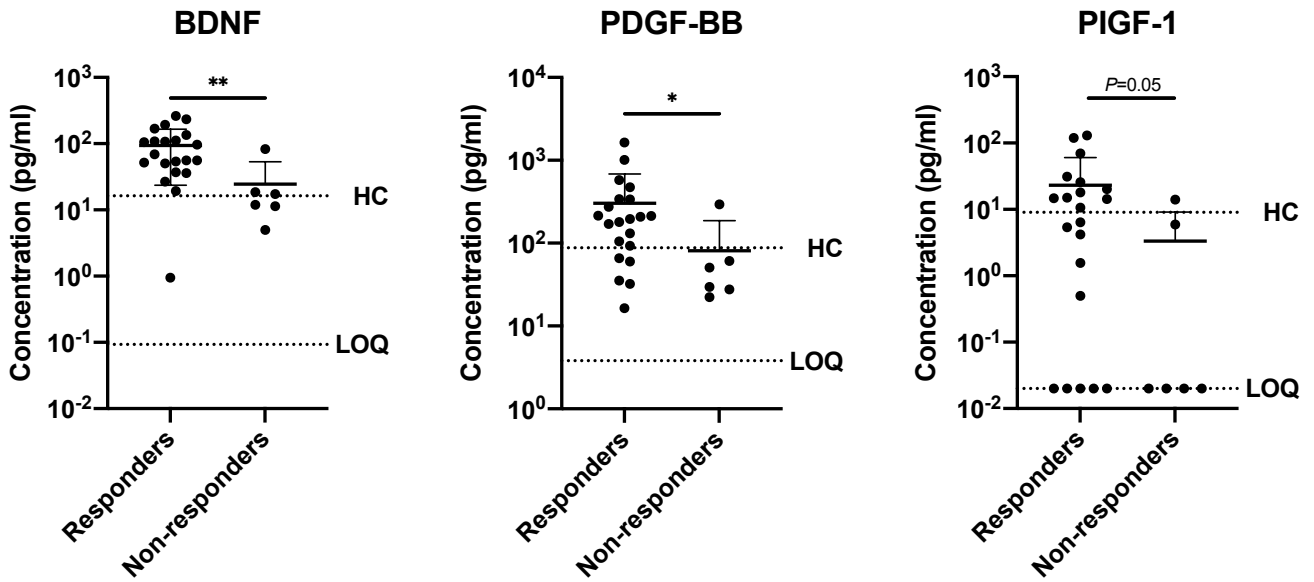

**Supplementary Figure 1. Higher recovery-associated immune mediator levels in responders to RDV treatment compared to non-responders.** Growth and recovery-associated factors brain-derived neurotrophic factor (BDNF), platelet-derived growth factor BB subunit (PDGF-BB) and placental growth factor (PIGF-1) levels in plasma before and one-week after RDV treatment in non-intubated responders (n=21, median 9 and 16 days post-illness onset (PIO), respectively) and intubated non-responders (n=6, median 7 and 13 days PIO, respectively). Statistical analyses were performed with Mann Whitney U test ( $*P<0.05$ ;  $**P<0.01$ ). Immune mediator levels for healthy controls (n=23) are indicated by the black dotted line. Patient samples with concentration out of measurement range are presented as the value of Limit of Quantification (LOQ).
