# Supplementary material for: Differential Cytokine Responses in Hospitalized COVID-19 Patients Limit Efficacy of Remdesivir
Source: PubMed Central journal article supplement (PMC8275132; doi:10.3389/fimmu.2021.680188), 2021-06-28
Supplement: DataSheet_2.pdf [file DataSheet_2.pdf]

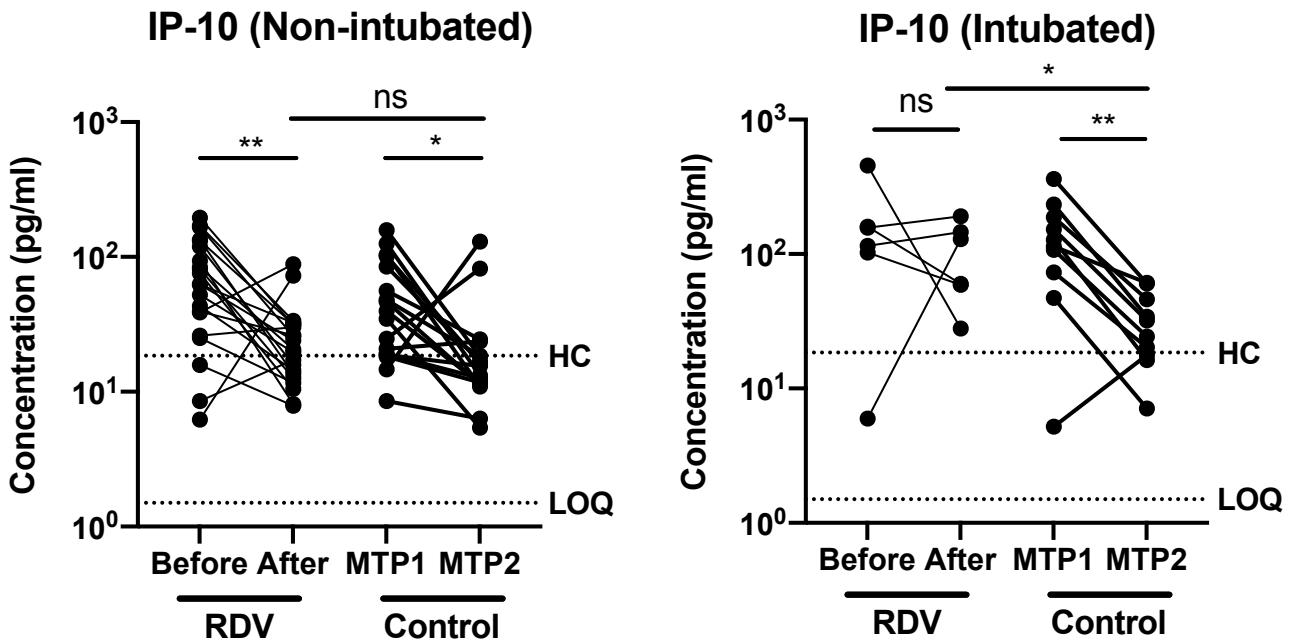

**Supplementary Figure 2. Remdesivir treatment results in sustained levels of pro-inflammatory IP-10 in intubated COVID-19 patients.**  $T_H1$ -associated immune mediator IP-10 levels in plasma before and one-week after RDV treatment in non-intubated responders ( $n=21$ , median 9 and 16 days post-illness onset (PIO), respectively) and intubated non-responders ( $n=6$ , median 7 and 13 days PIO, respectively), and matched timepoint 1 and 2 in non-RDV-treated non-intubated ( $n=17$ , median 10 and 16 days PIO, respectively) and intubated ( $n=10$ , median 6 and 12 days PIO, respectively) controls. Statistical analyses were performed with Wilcoxon matched-pairs signed rank test when comparing between timepoints, and Mann Whitney U test when comparing across groups ( $*P<0.05$ ;  $**P<0.01$ ). Immune mediator levels for healthy controls ( $n=23$ ) are indicated by the black dotted line. Patient samples with concentration out of measurement range are presented as the value of Limit of Quantification (LOQ).
