# Supplementary material for: Differential Cytokine Responses in Hospitalized COVID-19 Patients Limit Efficacy of Remdesivir
Source: PubMed Central journal article supplement (PMC8275132; doi:10.3389/fimmu.2021.680188), 2021-06-28
Supplement: DataSheet_3.pdf [file DataSheet_3.pdf]

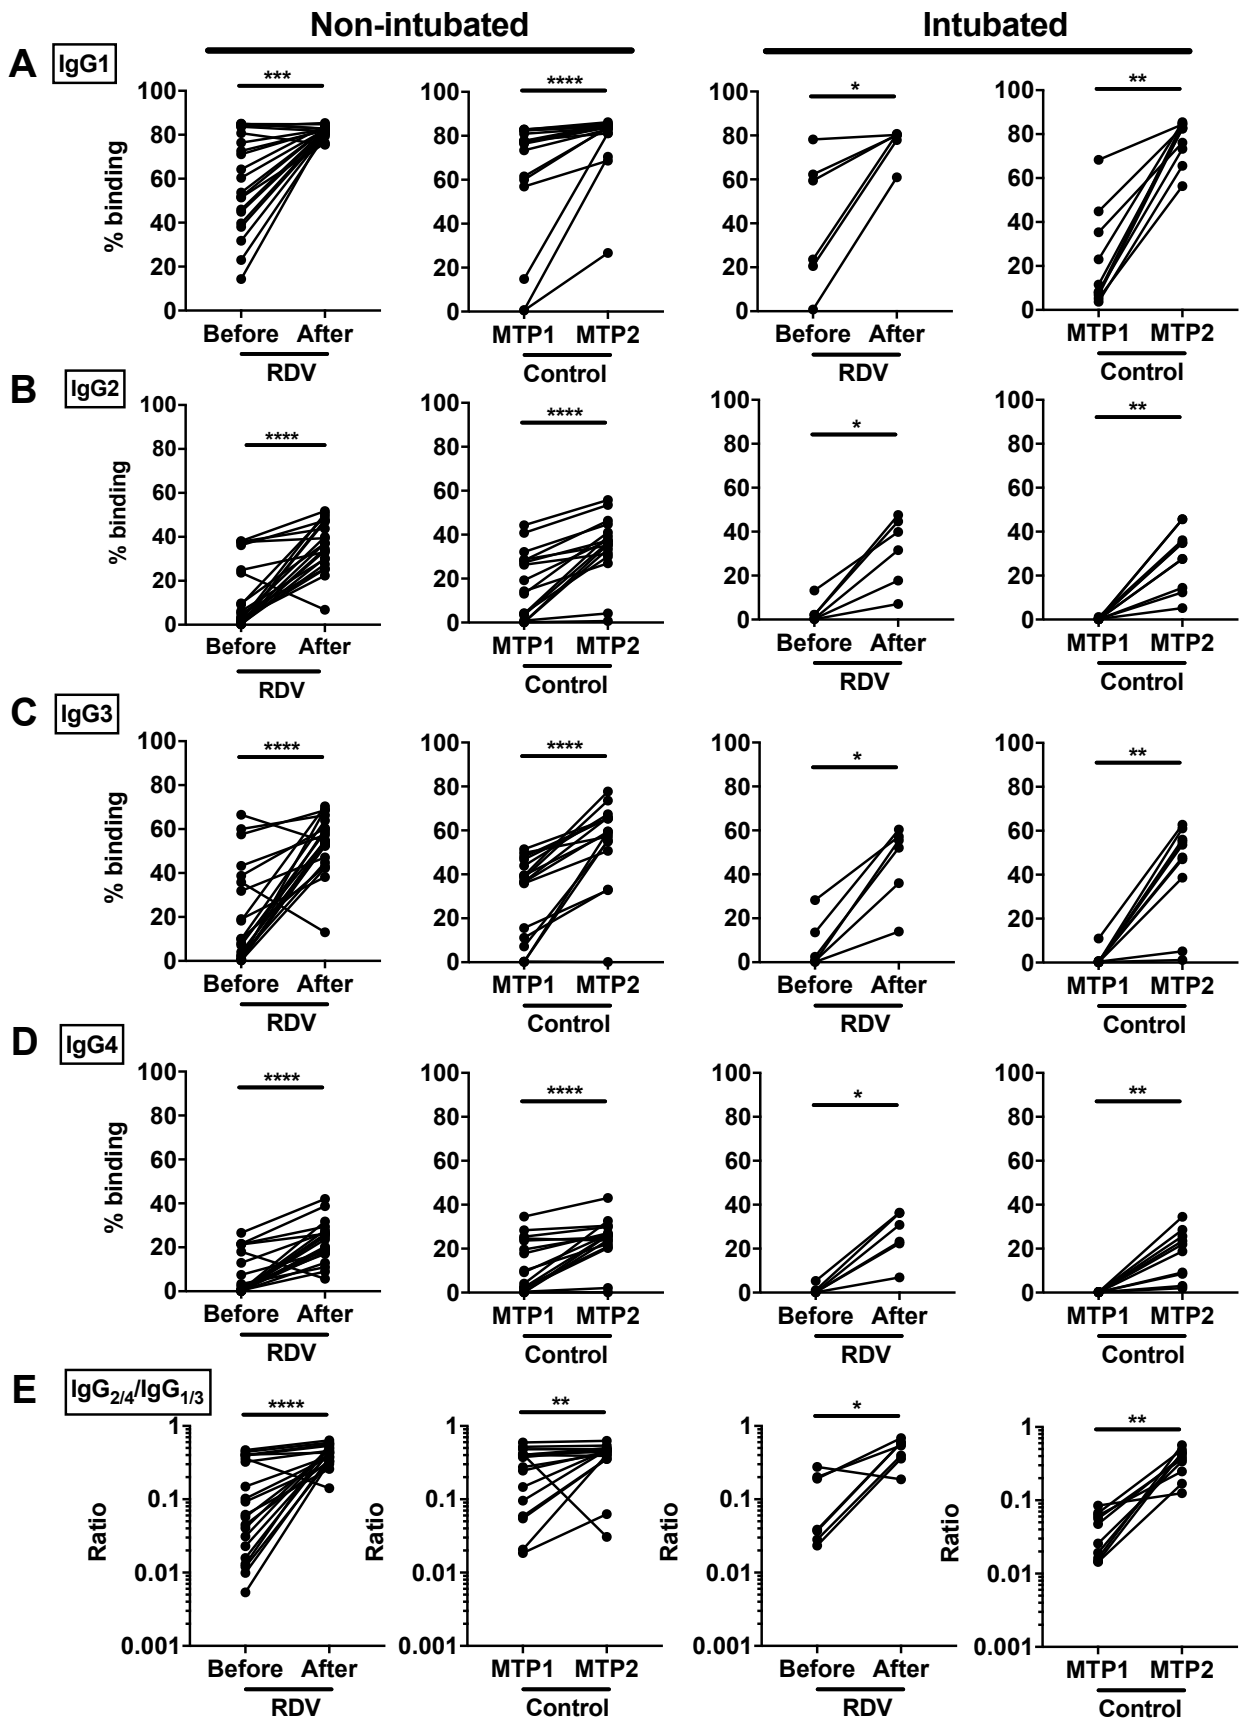

**Supplementary Figure 3. S protein IgG subclasses responses in hypoxia or intubated patients with or without remdesivir (RDV) treatment.** Plasma samples of non-intubated COVID-19 patients with RDV (n=21) or without RDV (n=17) treatment, and intubated COVID-19 patients with RDV (n=6) or without RDV (n=10) treatment were screened at 1:100 dilution against cells expressing the full-length SARS-CoV-2 spike protein, with healthy donors screened in parallel (n=22). (A) IgG1, (B) IgG2, (C) IgG3, and (D) IgG4 responses, (E) ratio of combined IgG2 and IgG4 to combined IgG1 and IgG3 response (IgG<sub>2/4</sub>/IgG<sub>1/3</sub>) in RDV-treated patients with or without intubation before and after treatment and also in non-RDV-treated patients at matched time point 1 and 2. Statistical analyses were performed with Wilcoxon matched-pairs signed rank test (\**P*<0.05; \*\**P*<0.01; \*\*\**P*<0.001; \*\*\*\**P*<0.0001).
