# Supplementary material for: Differential Cytokine Responses in Hospitalized COVID-19 Patients Limit Efficacy of Remdesivir
Source: PubMed Central journal article supplement (PMC8275132; doi:10.3389/fimmu.2021.680188), 2021-06-28
Supplement: DataSheet_4.pdf [file DataSheet_4.pdf]

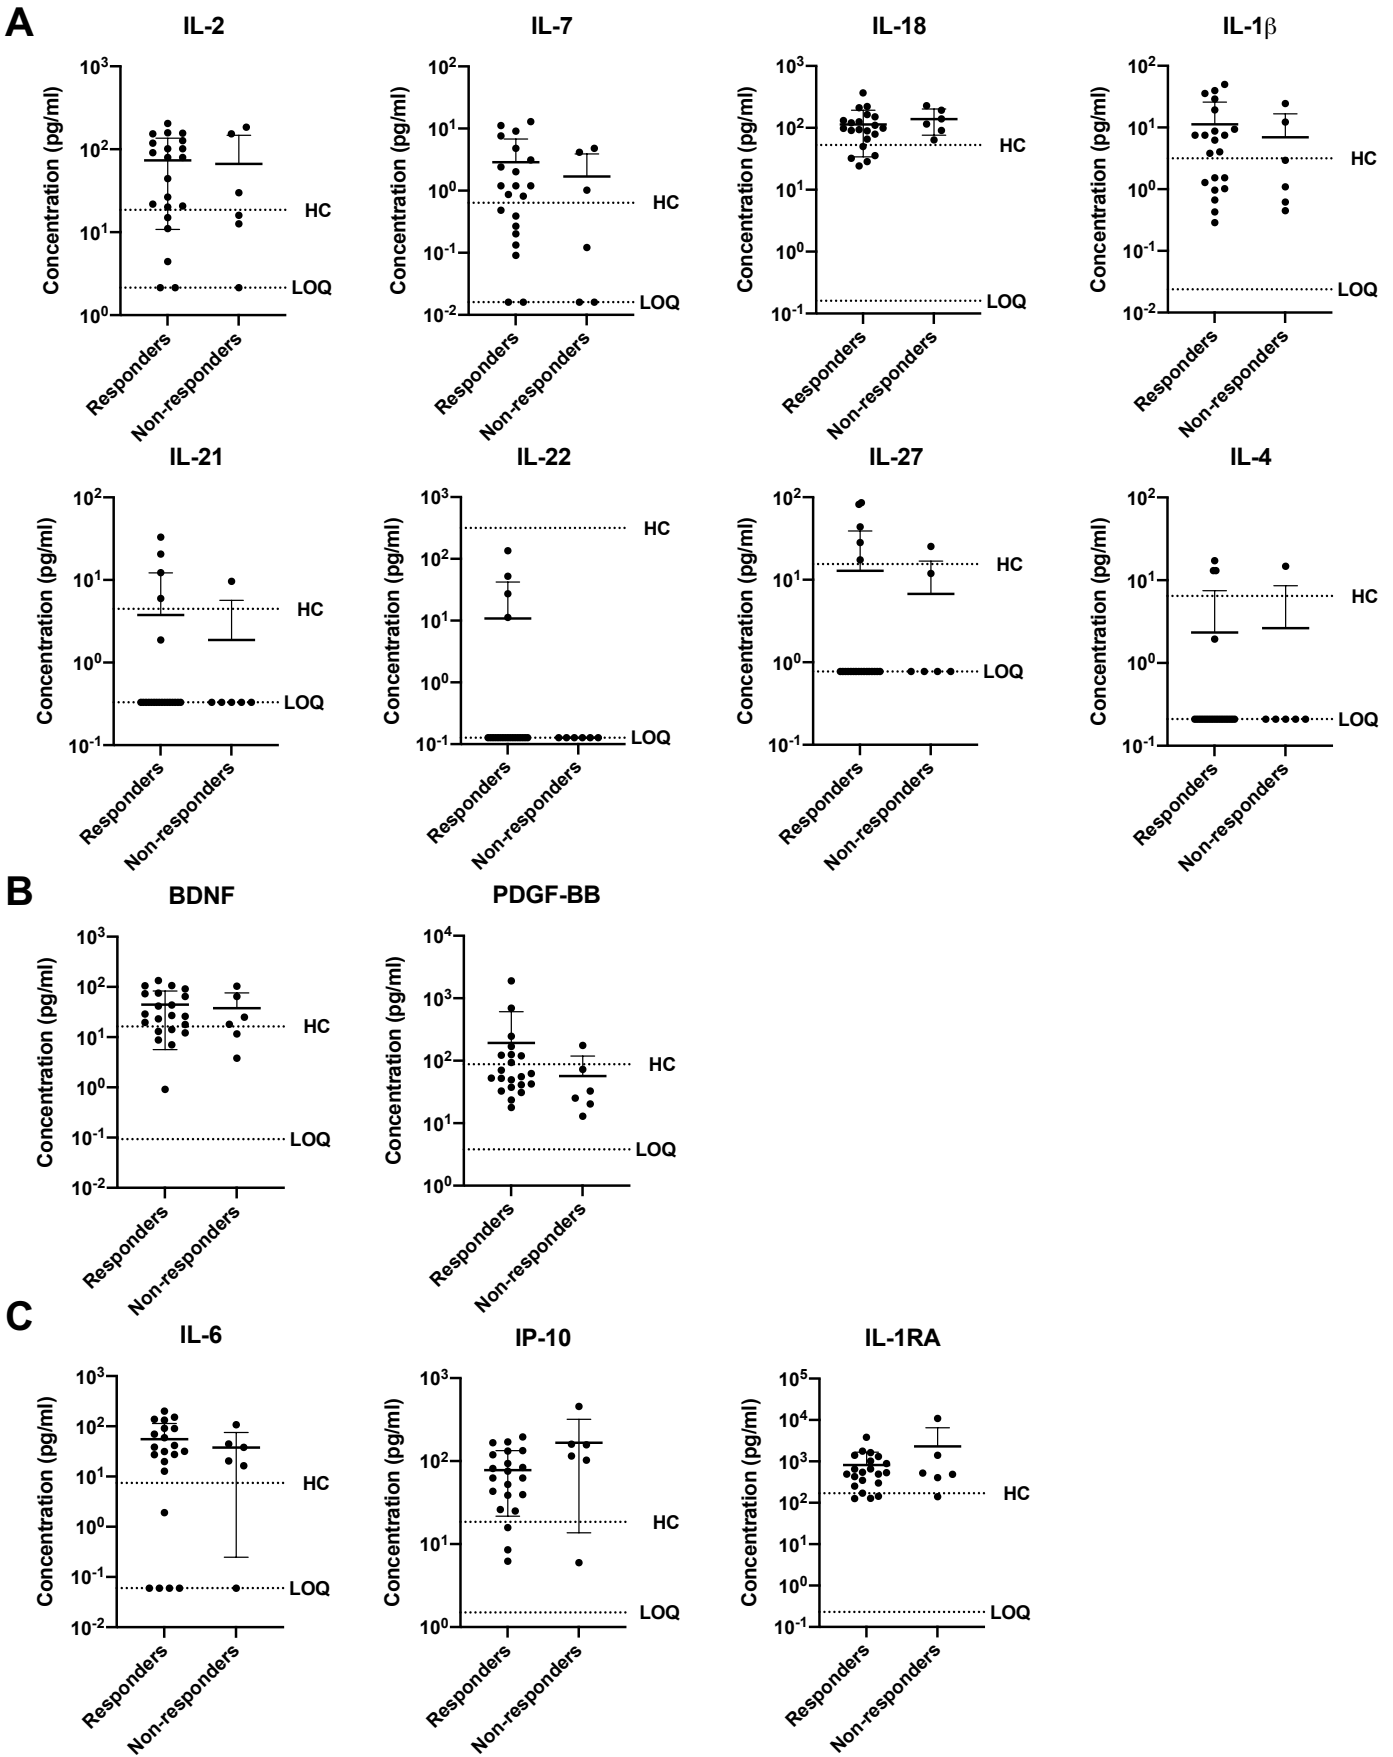

**Supplemental Figure 4. Baseline concentrations of immune mediators in COVID-19 patients treated with Remdesivir (RDV).** Scatter plots of baseline immune mediator levels in plasma samples of COVID-19 patients before RDV treatment. All patients (n=27) were receiving supplemental oxygen and not intubated prior to treatment. Patients were categorized based on their eventual disease progression to requiring intubation (Non-responders, median 7 days post-illness onset (PIO), n=6), or not (Responders, median 9 days PIO, n=21). Immune mediators were grouped based on their association with **(A)** T cells, **(B)** growth and recovery, or **(C)** inflammation. Statistical analyses were performed with Mann Whitney U test (\* $P < 0.05$ ; \*\* $P < 0.01$ ). Immune mediator levels for healthy controls (n=23) are indicated by the black dotted line. Patient samples with concentration out of measurement range are presented as the value of Limit of Quantification (LOQ).
