# Supplementary material for: Differential Cytokine Responses in Hospitalized COVID-19 Patients Limit Efficacy of Remdesivir
Source: PubMed Central journal article supplement (PMC8275132; doi:10.3389/fimmu.2021.680188), 2021-06-28
Supplement: DataSheet_6.pdf [file DataSheet_6.pdf]

**A**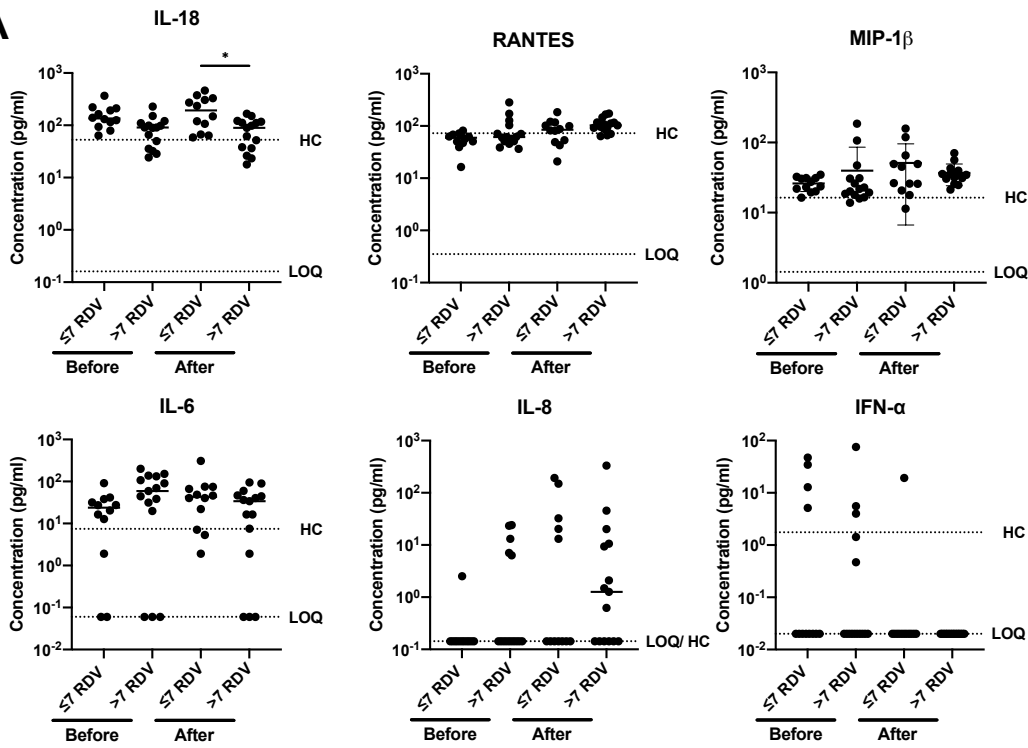**B**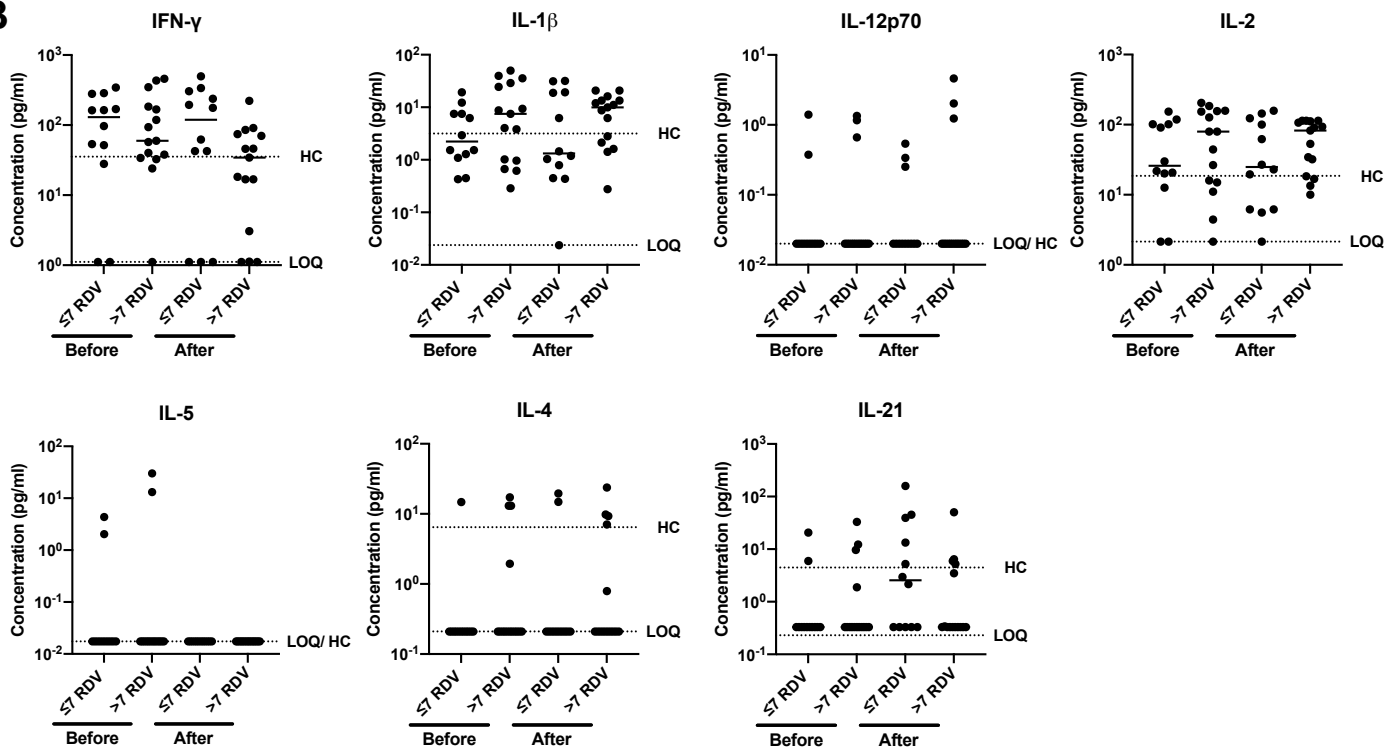

**Supplemental Figure 6. Early or late RDV treatment did not impact COVID-19 disease progression.** RDV-treated patients were stratified based on their RDV treatment timing relative to days post-illness onset (PIO) ( $\leq 7$  days ( $n=12$ , median 6 days PIO) or  $>7$  days ( $n=15$ , median 9 days PIO)). Immune mediator levels in plasma samples collected before and one week after RDV treatment were measured and compared. Immune mediators were grouped based on their associations with **(A)** inflammatory or **(B)** T cell responses. Statistical analyses were performed with Kruskal Wallis test with Dunn's multiple comparison ( $*P < 0.05$ ). Immune mediator levels for healthy controls ( $n=23$ ) are indicated by the black dotted line. Patient samples with concentration out of measurement range are presented as the value of Limit of Quantification (LOQ).
