# Supplementary material for: Differential Cytokine Responses in Hospitalized COVID-19 Patients Limit Efficacy of Remdesivir
Source: PubMed Central journal article supplement (PMC8275132; doi:10.3389/fimmu.2021.680188), 2021-06-28
Supplement: DataSheet_7.pdf [file DataSheet_7.pdf]

Supplementary Table 1: Demographics of healthy controls

| <b>Sample ID</b> | <b>Age</b> | <b>Gender</b> |
|------------------|------------|---------------|
| 4226             | 45         | M             |
| 3WLY             | 46         | F             |
| 4DUY             | 45         | M             |
| 5UEN             | 45         | F             |
| 6225             | 57         | M             |
| 6233             | 55         | F             |
| 1960             | 55         | F             |
| 1969             | 56         | F             |
| 6280             | 55         | F             |
| 1977             | 57         | F             |
| 0517             | 67         | F             |
| 6209             | 65         | M             |
| 1908             | 62         | F             |
| 7020             | 72         | M             |
| 1899             | 74         | M             |
| 1805             | 63         | F             |
| 1514             | 70         | M             |
| DZQV 2015        | 27         | M             |
| 4RQT 2015        | 23         | F             |
| 9JD4 2015        | 26         | F             |
| CZJE 2015        | 29         | M             |
| 5JGU 2015        | 26         | F             |
| 4DS3 2016        | 27         | F             |
